# Supplementary material for: A novel Aβ-fibrinogen interaction inhibitor rescues altered thrombosis and cognitive decline in Alzheimer’s disease mice
Source: PubMed Central journal article supplement — J Exp Med. 2014 Jun 2;211(6):1049–62. doi: 10.1084/jem.20131751 (PMC4042638; doi:10.1084/jem.20131751), 2014-06-02
Supplement: supp_jem.20131751_JEM_20131751_sm.pdf [file supp_jem.20131751_JEM_20131751_sm.pdf]

## SUPPLEMENTAL MATERIAL

Ahn et al., <http://www.jem.org/cgi/content/full/jem.20131751/DC1>

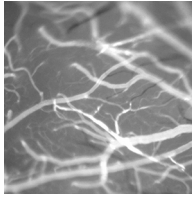

**Video 1. Intravital imaging of FeCl<sub>3</sub>-induced thrombosis of vehicle-treated WT mice.** Blood flow and blood vessel occlusion were visualized using time-lapse epifluorescence microscopy as increasing concentrations of FeCl<sub>3</sub> (5, 10, and 15%) were added directly to the brain surface.

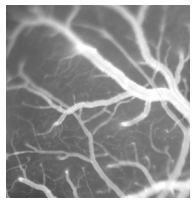

**Video 2. Intravital imaging of RU-505-treated WT mice.** Blood flow and blood vessel occlusion were visualized using time-lapse epifluorescence microscopy as increasing concentrations of FeCl<sub>3</sub> (5, 10, and 15%) were added directly to the brain surface.

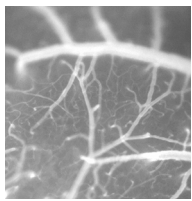

**Video 3. Intravital imaging of vehicle-treated Tg6799 mice.** Blood flow and blood vessel occlusion were visualized using time-lapse epifluorescence microscopy as increasing concentrations of FeCl<sub>3</sub> (5, 10, and 15%) were added directly to the brain surface.

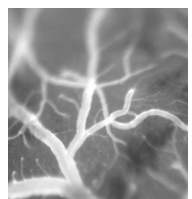

**Video 4. Intravital imaging of RU-505-treated Tg6799 mice.** Blood flow and blood vessel occlusion were visualized using time-lapse epifluorescence microscopy as increasing concentrations of FeCl<sub>3</sub> (5, 10, and 15%) were added directly to the brain surface.
